# Supplementary material for: Has the free maternal health policy eliminated out of pocket payments for maternal health services? Views of women, health providers and insurance managers in Northern Ghana
Source: PLoS One. 2018 Feb 1;13(2):e0184830. doi: 10.1371/journal.pone.0184830 (PMC5794072; doi:10.1371/journal.pone.0184830)
Supplement: S3 File — (XLSX) [file pone.0184830.s003.xlsx]

## Sheet: Supporting file for figures
	Type of health facilities visited
	Community-based Health Planning Services (CHPS)	0.495
	Public Clinic	0.017
	Private Clinic	0.01
	Health Centre	0.308
	District hospital	0.165
	Other	0.005
	Coverage of all expenses
	Covered all expenses?
	Yes	0.103
	No	0.897
	Financing of health expenditure
	Used savings	0.655
	Borrowed money	0.035
	Sold assets	0.219
	Did not incur any expense	0.091
	Suggestions for improving maternal health services
	Reduce travel distance and time	0.091
	Reduce waiting time	0.042
	Reduce cost	0.438
	Good providers relations	0.01
	Providing qualified staff	0.143
	Improving drugs supply	0.276
